# Supplementary material for: Dual targeting nanoparticles for epilepsy therapy
Source: Royal Society of Chemistry journal article supplement (doi:10.1039/d2sc03298h), 2022-01-01
Supplement: d2sc03298h1.pdf [file d2sc03298h1.pdf]

# 1 Dual Targeting Nanoparticles for Epilepsy Therapy

2 Qinghong Hou <sup>a, b, c†</sup>, Lulu Wang <sup>d‡</sup>, Feng Xiao <sup>a</sup>, Le Wang <sup>a</sup>, Xiaoyan Liu <sup>a</sup>, Lina Zhu  
3 <sup>c</sup>, Yi Lu <sup>\*d</sup>, Wenfu Zheng <sup>\*b</sup>, Xingyu Jiang <sup>\*a</sup>

4

5 <sup>a</sup> Qinghong Hou, Feng Xiao, Le Wang, Xiaoyan Liu, Prof. Xingyu Jiang

6 Shenzhen Key Laboratory of Smart Healthcare Engineering, Guangdong Provincial  
7 Key Laboratory of Advanced Biomaterials, Department of Biomedical Engineering,  
8 Southern University of Science and Technology, Shenzhen 518055, P. R. China.

9 E-mail: jiang@sustech.edu.cn.

10 <sup>b</sup> Qinghong Hou, Prof. Wenfu Zheng

11 CAS Key Laboratory for Biomedical Effects of Nanomaterials and Nanosafety,  
12 National Center for NanoScience and Technology, Beijing 100190, P. R. China

13 E-mail: zhengwf@nanoctr.cn

14 <sup>c</sup> Qinghong Hou, Prof. Lina Zhu

15 Department of Chemistry, School of Science, Tianjin University, Tianjin 300350, P.  
16 R. China

17 <sup>d</sup> Lulu Wang, Prof. Yi Lu

18 CAS Key Laboratory of Brain Connectome and Manipulation, the Brain Cognition  
19 and Brain Disease Institute, Shenzhen Institute of Advanced Technology, Chinese  
20 Academy of Sciences; Shenzhen-Hong Kong Institute of Brain Science-Shenzhen  
21 Fundamental Research Institutions, Shenzhen 518055, P. R. China.

22 E-mail: luyi@siat.ac.cn

23

## 24 Experimental Methods

## 25 Materials

26 PLGA (lactide:glycolide = 75:25) was from Evonik Industries (Germany). 1,2-  
27 Dihexadecanoylrac-glycero-3-phosphocholine (DPPC), cholesterol, distearoyl  
28 phosphoethanolamine (DSPE)-polyethylene glycol (PEG) 2k, and DSPE-PEG2k-Mal

were from Avanti Polar lipids (USA). Dimethylformamide, trifluoroethanol, lamotrigine, pilocarpine hydrochloride, and urethane were from Aladdin. Neurobasal medium, B27 supplement, penicillin/streptomycin (PS), F12/DMEM medium, FBS and 1×PBS (and 10×PBS) were from Gibco. DiR was from Invitrogen. DAPI and kainic acid (KA) monohydrate were from Sigma. Cell viability test kit and DiI were from Shenzhen Kailian Biotechnology Co., Ltd. GFAP was from Abcam. NeuN was from Millipore. Alexa Fluor 594 affipure goat anti-rabbit IgG (H<sub>0</sub>L) and Alexa Fluor 488 affipure goat anti-rabbit IgG (H<sub>0</sub>L) were from Jackson ImmunoResearch.

#### **Synthesis of DSPE-PEG2k-D-T7 and DSPE-PEG2k-Tet1**

DSPE-PEG2k-D-T7 was synthesized by conjugating DSPE-PEG2k-Mal to a cysteine conjugated on D-T7 peptide (D-T7-Cys). Briefly, D-T7-Cys reacted with DSPE-PEG2k-Mal (5:1 molar ratio) at RT under mild shaking for 24 h in PBS (Na<sub>2</sub>HPO<sub>4</sub> and EDTA, pH = 7.2). The unreacted D-T7 peptides and the salts in the reaction system were removed by an Amicon Ultra-4 ultrafilter (MWCO = 3KD, Millipore). The DSPE-PEG2k-Tet1 was prepared in the same way. The final solution was freeze-dried and stored at -20 °C until further use. Liquid chromatography-quadrupole orbitrap mass spectrometer (LC-MS, Q Exactive) of DSPE-PEG2k-Mal, D-T7-Cys, Tet1-Cys and DSPE-PEG2k-D-T7, DSPE-PEG2k-Tet1 were performed to confirm the successful synthesis.

#### **Preparation and characterization of lipids@PL NPs with different surface coatings**

The design and fabrication method of the microfluidic chip was the same as the previous work.<sup>1</sup> In short, the microfluidic chip consisted of two stages, the first stage consisted of three liquid inlets and a straight reaction channel. The second stage consisted of a central liquid inlet and a spiral mixing channel. The three inlet channels of the first stage were 100 μm wide and 60 μm high. The width and height of the

central liquid inlet channel and the spiral mixing channel of the second stage was 300  $\mu\text{m}$  and 60  $\mu\text{m}$  respectively <sup>2</sup>. We synthesized LTG-loaded PLGA NPs (lipids@PL) with different surface coatings using a microfluidic chip. (Scheme 1). PLGA was dissolved in DMF and TFE (v/v = 7:3) to form a 10 mg/mL PLGA solution. The initial concentration of LTG in PLGA solution was 238  $\mu\text{g/mL}$ . For lipids@PL, the lipid solution was composed of DPPC, cholesterol, DSPE-PEG with a molar ratio of 80:16:11, For D-T7-lipids@PL, the lipid solution was composed of DPPC, cholesterol, DSPE-PEG2k, DSPE-PEG2k-D-T7 with a molar ratio of 80:16:9:2. For preparing Tet1-lipids@PL, the lipid solution was composed of DPPC, cholesterol, DSPE-PEG2k, DSPE-PEG2k-Tet1 with a molar ratio of 80:16:9:2. For preparing D-T7/Tet1-lipids@PL NPs with different D-T7/Tet1 ratios (2:1, 1:1, and 1:2), the lipid solutions were composed of DPPC, cholesterol, DSPE-PEG2k, DSPE-PEG2k-D-T7 and DSPE-PEG2k-Tet1 with a molar ratio of 80:16:8:2:1, 80:16:8:1:1, and 80:16:8:1:2 respectively. The synthesis process of the nanoparticles on the microfluidic channels is shown in Scheme 1. The flow rate of PLGA and lipids was 3 mL/h, and the flow rate of H<sub>2</sub>O was 120 mL/h.

The microfluidic chip was composed of two parts. The first part of the chip was composed of three inlets and a straight synthesis channel which was divided into two curved channels to symmetrically connect the central inlet of the second part. The mixed solution of PLGA and LTG flowed into the central inlet and was precipitated in the water flowing from the flanking inlets to form a hydrophobic PLGA@LTG (PL) core in the first part. In the second part, a central inlet connected to the two curved channels from the first part and formed a single channel which extended and formed a double spiral channel connecting to an outlet. In the second part, through the hydrophobic attraction between the tail end of the lipids and the PLGA, the lipid monolayer shell was assembled on the surface of the PL core to synthesize lipids@PL. Targeting peptides conjugated to DSPE-PEG2k including D-T7-DSPE-PEG2k, and Tet1-DSPE-PEG2k mixed with the lipids at certain ratios were introduced into the central inlet of the second part to form lipids@PL nanoparticles with different

85 targeting molecules. In addition, we also synthesized D-T7/Tet1-lipids@PL NPs  
86 using conventional methods.<sup>3</sup>

87 Dynamic light scattering (DLS, Zetasizer 3000HS) and transmission electron  
88 microscopy (TEM, HT-7700) were used to characterize the morphology, size and size  
89 distribution, and surface charge of the nanoparticles. Each sample was tested three  
90 times separately. The samples for TEM were diluted and negatively stained with 2%  
91 uranyl acetate.

#### 92 **Encapsulation efficiency of LTG by D-T7/Tet1-lipids@PL NPs**

93 To determine the encapsulation efficiency of LTG by D-T7/Tet1-lipids@PL NPs, we  
94 prepared different concentrations of LTG (0, 0.3125, 0.625, 1.25, 2.5, 5, 10, 20, 40,  
95 80 µg/mL), and established the standard curve of LTG concentration by a UV-VIS  
96 spectrophotometer (UV-2600 Shimadzu) with the excitation wavelength at 306 nm.  
97 The D-T7/Tet1-lipids@PL NPs were filtered by a microsep (MWCO=10 KD,  
98 Millipore) after synthesized by the microfluidics. The concentration of LTG in the  
99 NPs was determined by the UV spectrophotometer.

#### 100 **LTG release from the D-T7/Tet1-lipids@PL NPs**

101 To study the release of LTG in various conditions, the free LTG and D-T7/Tet1-  
102 lipids@PL(2:1) NPs (238 µg/mL LTG) were added to dialysis bags (MW=3 KD,  
103 Millipore). The bags were placed into PBS (pH=7.2, 3 mL), followed by an  
104 incubation for 72 h on a shaking table at 37°C. We collected the dialysate at each  
105 predetermined time point (0, 3, 6, 9, 24, 48, 72 h), and moved the dialysis bags into  
106 fresh PBS (3 mL). The concentration of LTG was determined using a UV  
107 spectrophotometer with the excitation wavelength at 306 nm. The cumulative release  
108 rate at each time point was calculated according to the formula: release rate at time i  
109 (%) = (sum of LTG concentration before i) / (sum of LTG concentration at 72 h)  
110 ×100%.

## 111 **Quantification of encapsulation efficiency of DSPE-PEG-D-T7 and DSPE-PEG-** 112 **Tet1 in D-T7/Tet1-lipids@PL NPs**

113 To quantitatively determine the encapsulation efficiency of DSPE-PEG-D-T7 and  
114 DSPE-PEG-Tet1 in the D-T7/Tet1-lipids@PL NPs, we labeled D-T7 peptide and  
115 Tet1 peptide with rhodamine B (RHB) and FITC respectively. We prepared different  
116 concentrations of LTG (0, 2.5, 5, 10, 50, 100, 200 µg/mL), and established the  
117 standard curve of D-T7-RHB and Tet1-FITC concentrations by a UV-vis  
118 spectrophotometer (UV-2600 Shimadzu) with the excitation wavelength at 554 nm  
119 and 488 nm, respectively. The D-T7/Tet1-lipids@PL NPs were filtered by a microsep  
120 (MWCO=10 KD, Millipore) after synthesized by the microfluidics. The concentration  
121 of D-T7 and Tet1 in the NPs was determined by the UV-vis spectrophotometer.

## 122 **Cells and animals**

123 Human neuroblastoma cells (SH-SY5Y) were from Kunming Cell Bank. Mouse  
124 cerebrovascular endothelioma cells (bEnd.3, KG593) were from Shenzhen Btek  
125 Technology Co., LTD. For cell culture, SH-SY5Y cells were cultured in RPMI 1640  
126 medium (15-20 % FBS, 1% penicillin/streptomycin). bEnd.3 cells were cultured in  
127 DMEM (10 % FBS, 1% penicillin/streptomycin). For primary culture of hippocampal  
128 neurons, the neonatal rats of 0-3 days were decapitated.<sup>4</sup> The brain was taken out and  
129 placed in pre-cooled PBS. The hippocampus was extracted and digested by 0.25%  
130 trypsin in a 37 °C water bath for 15 min. The dissociated neurons were inoculated in  
131 confocal dishes or 12-well plate with DMEM/F12 medium (10 % FBS, 1 %  
132 penicillin/streptomycin). After the cells adhered to the wall, the F12 medium was  
133 replaced with the neurobasal medium (2 % B27, 1 % penicillin/streptomycin). The  
134 medium was changed every three days.

135 All protocols of animal experiments are approved by the Institutional Animal Care  
136 and Use Committee at the Southern University of Science and Technology (resolution  
137 number: SUSTC-JY2020124). All animals including male BALB/c nude mice and

138 male/female C57BL/6 mice (6-8 weeks) and neonatal rats were from Guangdong  
139 Medical Laboratory Animal Center (Guangzhou, China).

#### 140 **Cellular internalization**

141 For cellular uptake study, hippocampal neurons, bEnd.3 cells and SY5Y cells were  
142 seeded into the confocal dishes with a density of  $1 \times 10^5$  cells per dish, followed by the  
143 addition of DiI-labelled nanoparticles. After co-incubation for 6 h at 37°C, the cells  
144 were rinsed with pre-warmed PBS three times, and were fixed with 4% PFA for 15  
145 min at 37°C. The cells were treated with PBS three times for 5 min each. The nuclei  
146 were stained with DAPI for 10 min. The neurons were visualized by staining the  
147 tubulin, whereas the SY5Y cells were visualized by staining the phalloidin. After  
148 washing with PBS three times for 5 min each, we imaged the cells using a confocal  
149 laser scanning microscopy (CLSM, A1, Nikon).

150 Uptake of DiI-labelled nanoparticles by hippocampal neurons, bEnd.3 cells and  
151 SY5Y cells was quantified by a flow cytometry (FACScanto, BD Biosciences). The  
152 hippocampal neurons, bEnd.3 cells and SY5Y cells were seeded in twelve-well plates  
153 with a density of  $1 \times 10^5$  cells per well. The cells were treated with DiI-labelled  
154 nanoparticles for 6 h. The cells were washed with pre-warmed PBS three times, and  
155 collected after trypsin treatment. Cells were quantitatively analyzed by the flow  
156 cytometry.

#### 157 **Penetration experiment of D-T7/Tet1-lipids@PL NPs in *in vitro* BBB model**

158 The hippocampal neurons were seeded into the lower chamber Transwell (Corning)  
159 with a density of  $5 \times 10^4$  cells per dish, and the bEnd.3 cells were seeded on 8.0  $\mu$ m PC  
160 membrane with a density of  $1 \times 10^5$  cells. The penetration experiment of nanoparticles  
161 started after the transendothelial electrical resistance (TEER) reached a stable state of  
162 about 80  $\Omega$ . After co-cultivating various nanoparticles in the BBB model for 6 hours,  
163 we rinsed the neurons three times with pre-warmed PBS, and collected the cells after  
164 trypsin treatment. The cells were quantitatively analyzed by the flow cytometry.

## 165 ***In vivo* fluorescence imaging**

166 In order to explore the transcytosis ability and accumulation capacity of the BBB,  
167 living fluorescence imaging technology (IVIS Spectrum, PerkinElmer) was used to  
168 monitor the biodistribution of a near infrared (NIR) dye (DiR)-labelled nanoparticles  
169 in nude mice. IVIS® Lumina Series III Imaging System can be used in two modes:  
170 bioluminescence and fluorescence. We used the fluorescence mode in this study. The  
171 focal length of the lens was 50 mm, and the light transmittance was 95%. The field of  
172 view ranged from 5×5 cm to 12.5×12.5 cm. The lens size of the charge coupled  
173 device (CCD) was 13.3×13.3 mm with a 1 million pixel. The imaging parameters we  
174 set were: the field of view was 12.5×12.5 cm; the wavelength of excitation filter was  
175 740 nm, the wavelength of emission filter was 790 nm; the binning factor was 4; the  
176 luminescent exposure time was 0.5s; the subject height was 1.5cm; the f number was  
177 2. The maximum excitation wavelength and emission wavelength of DiR was 748 nm  
178 and 780 nm respectively. The nude mice were injected with DiR-labelled  
179 nanoparticles (DiR=0.75 mg/mL) *via* tail vein, respectively. Fluorescence images  
180 were obtained at 0.5, 2, 4, 6, 12, and 24 h. We selected the brain and the whole body  
181 ROIs respectively, and measured the corresponding fluorescence intensity. The mice  
182 were sacrificed 24 h after the injection, and their organs were collected and imaged by  
183 using the *in vivo* imaging system.

## 184 **Immunohistochemistry**

185 PBS and various DiI-labelled D-T7/Tet1-lipids@ PL were injected to seven groups of  
186 C57BL/6 mice (n = 3) *via* tail vein. The mice were sacrificed 6 h later. After  
187 perfusion, the brain tissue was removed and immersed in paraformaldehyde (4% w/v).  
188 A Leica CM1950 cryostat microtome was used to slice the brain into 35-μm thick  
189 coronal slices. The slices were treated with PBS three times for 5 min each and  
190 blocked in 10% normal goat serum for 1 h. The samples were then incubated with  
191 primary antibodies (GFAP; NeuN) overnight at room temperature, washed with PBS  
192 and incubated with secondary antibodies (Alexa Fluor 594-conjugated affipure goat

193 anti-rabbit IgG (H<sub>p</sub>L); Alexa Fluor 488 affinpure goat anti-rabbit IgG (H<sub>p</sub>L) for 1 h.  
194 After washing with PBS three times for 5 min each, the sections were mounted onto  
195 gelatin-coated slides and cover slipped with a signal enhancer (ProLong Gold  
196 Antifade Reagent with DAPI). In addition, we performed immunofluorescence  
197 staining of blood vessels in the D-T7/Tet1-lipids@PL(2:1)-treated brains using CD31  
198 antibody. The mounted slices were observed and imaged using an Olympus slide  
199 scanner (VS120).

## 200 **Cytotoxicity assay**

201 The cytotoxicity of various lipids@PL nanoparticles was assessed by CCK-8 assay.  
202 The hippocampal neurons and SY5Y cells were seeded into 96-well plates with a  
203 density of  $5 \times 10^4$  cells per well in the neurobasal medium for 24 h prior to the  
204 experiment. The culture medium was substituted with 100  $\mu$ L lipids@PL with  
205 different surface modification ligands with serial concentrations from 62.5  $\mu$ g/mL to  
206 1000  $\mu$ g/mL for 24 h. Each concentration was replicated in 5 wells. the medium in  
207 each well was replaced with freshly medium with 1% CCK-8 for 1 h. the absorbance  
208 was measured by a microplate reader (Spark, Tecan) at 450 nm.

209 We used cell viability assay kit to characterize cytotoxicity. Neurons were seeded  
210 into confocal dishes with a density of  $1 \times 10^5$  cells per dish, 100  $\mu$ L lipids@PL  
211 nanoparticles with different surface modification ligands (1000  $\mu$ g/mL) were added.  
212 After co-incubation for 24 h at 37 °C, the cells were washed with pre-warmed PBS  
213 two times, cell viability assay kit was used to characterize the toxicity of the  
214 nanoparticles to the neurons, and the cells were imaged using a confocal microscopy.

## 215 **Hemolysis test**

216 Mouse whole blood was collected in a heparin-treated centrifuge tube and diluted  
217 with PBS. The diluted blood was centrifuged at 2000 rpm for 5 min and the  
218 supernatant was removed. The red blood cells were suspended in PBS (pH 7.4) at a  
219 final concentration of 2 %. Subsequently, the cell suspension was incubated with

220 purified water (positive control), PBS (negative control) and nanoparticles of different  
221 concentrations (62.5, 250, and 1000 µg/mL) at 37 °C for 4 h. The red blood cells were  
222 centrifuged at 2000 rpm for 5 min, and 100 µL supernatant was transferred to a 96-  
223 well plate. The sample was measured at 490 nm with a microplate reader (Spark,  
224 Tecan).

#### 225 ***In vivo* electrophysiological recording for KA-induced acute epilepsy model**

226 For the construction of KA-initiated epilepsy model, C57BL/6J mouse was  
227 anesthetized with urethane (1.5 g/kg), and the head was fixed in a standard stereotaxic  
228 frame (RWD). The cranium was exposed through a small midline scalp incision.  
229 Holes were drilled through the skull, and a drug delivery electrode array was directed  
230 towards the brain at the following stereotaxic coordinates: the electrode tip at  
231 anteroposterior (AP) -2.06 mm, mediolateral (ML) -1.35 mm and dorsoventral (DV) -  
232 2.10 mm for recording in the dorsal hippocampus (dHPC); The silica tubing at AP -  
233 2.06 mm, ML -1.80 mm and DV -1.60mm for drug delivery in the dorsal  
234 hippocampus. KA (0.3 mg/mL in PBS solution) was unilaterally injected into the  
235 dorsal hippocampus via the drug delivery electrode array using a micropump.

236 Electrophysiological recordings were performed with a 64-channel neural  
237 acquisition processor (Plexon). The local field potentials (LFPs) were sampled at 1  
238 kHz, and bandpass was filtered at 1-500 Hz. Neural signal analyses were performed  
239 using a Plexon NeuroExplorer software and a custom-designed Matlab (Mathworks)  
240 code. Phosphate-buffered saline (PBS), LTG (2 mg/kg), lipids@PL (2 mg/kg), Tet1-  
241 lipids@PL (2 mg/kg), D-T7-lipids@PL (2 mg/kg), D-T7/Tet1-lipids@PL (2:1) (2  
242 mg/kg) and D-T7/Tet1-lipids@PL (2:1) (5 mg/kg) were intravenously injected 2 h  
243 before the establishment of the KA model. LFPs were monitored and recorded in the  
244 dorsal hippocampus of the mice after KA injection, and the signals were recorded for  
245 2.5 h by the neural acquisition processor.

#### 246 ***In vivo* behavior recording for pilocarpine-induced acute epilepsy model**

247 For the construction of pilocarpine-initiated epilepsy model, C57BL/6 mice were  
248 divided into 4 groups, and injected intraperitoneally with methylscopolamine (1  
249 mg/kg). 30 min later, pilocarpine (320 mg/kg) was intraperitoneally injected.  
250 Approximately 10 min after the administration, persistent seizures were induced. We  
251 injected PBS, lipids@PL (2 mg/kg), and D-T7/Tet1-lipids@PL(2:1) (2 mg/kg)  
252 intravenously respectively 2 h before the construction of the model. We recorded the  
253 real-time epileptic behavior for 40 min, 1.5 h, and 4 h by video.

#### 254 **Treatment of D-T7/Tet1-lipids@PL NPs in a KA-induced chronic epilepsy model**

255 C57 BL/6J mice of 6-8 weeks were used for constructing chronic epilepsy models.  
256 KA (0.3 mg/mL, 550 nL) was injected into the right dorsal hippocampus (AP -2.06  
257 mm, ML -1.80 mm, DV -1.80 mm) *via* a 33-gauge metal needle connected with a  
258 micro-syringe pump (UMP3/Micor4). Electrophysiological recordings and  
259 immunohistochemistry were performed in epileptic mice treated with PBS, LTG, D-  
260 T7/Tet1-lipids@PL(2:1) NPs for 6 weeks.

#### 261 **Safety evaluation**

262 After the experiment, the mice were sacrificed and dissected, and the heart, liver,  
263 spleen, lung, kidney, and brain were sliced for hematoxylin-eosin (H&E) staining. In  
264 addition to H&E staining, blood biochemical indicators markers were evaluated. We  
265 took 500  $\mu$ L of blood from the eyeball, at 3500 rpm, 4°C, centrifuged for 5 min, took  
266 out 100  $\mu$ L of serum and used the automatic biochemical analyzer (MS-480) to test  
267 the blood biochemical indicators. The parameters tested in this study included  
268 glutamic-pyruvic transaminase (ALT), glutamic oxalacetic transaminase (AST),  
269 (alkaline phosphatase) ALP, total protein (TP), serum albumin (ALB), carbamide  
270 (urea). Similarly, take 100  $\mu$ L of whole blood from the eyeball for routine blood  
271 testing. The parameters tested in this study included white blood cells (WBC), red  
272 blood cell (RBC), hemoglobin (HGB), mean RBC hemoglobin (MCH), red cell

273 distribution width (RDW), platelets (PLT), mean platelet volume (MPV), mean  
 274 corpuscular hemoglobin concentration (MCHC) and mean corpuscular volume (MCV).

## 275 Statistics

276 The data were expressed as mean  $\pm$  SD. The statistical analysis of different  
 277 experimental groups was performed using Student's *t* test.  $P < 0.05$ ,  $P < 0.01$ ,  $P < 0.001$   
 278 were used as the standards of statistical significance.

## 279 Results and Discussion

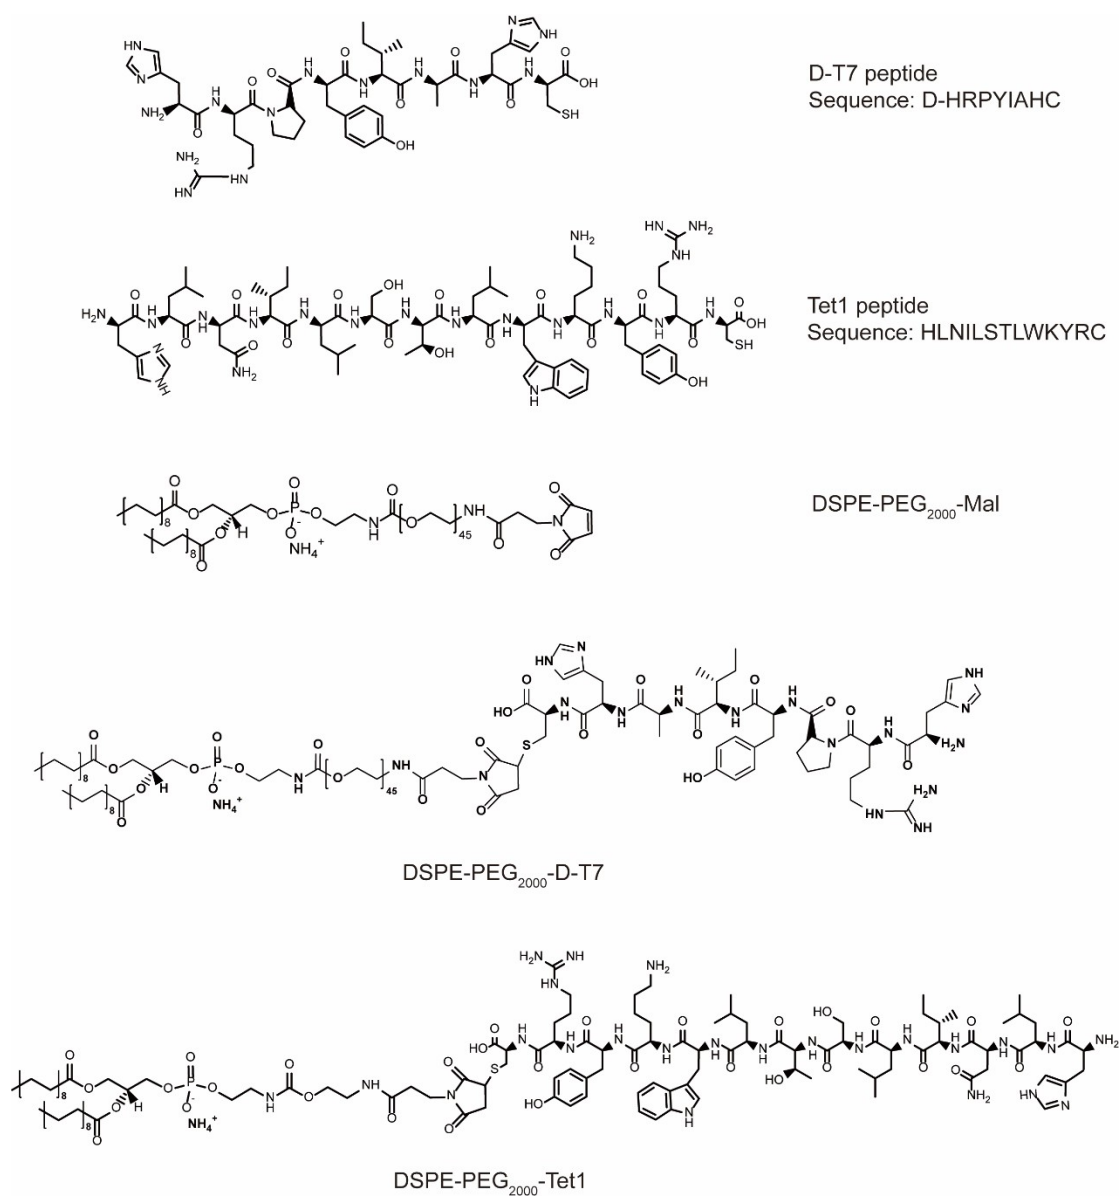

280

281 **Figure S1** Structural formula of the peptides and the DSPE-PEG-peptides.

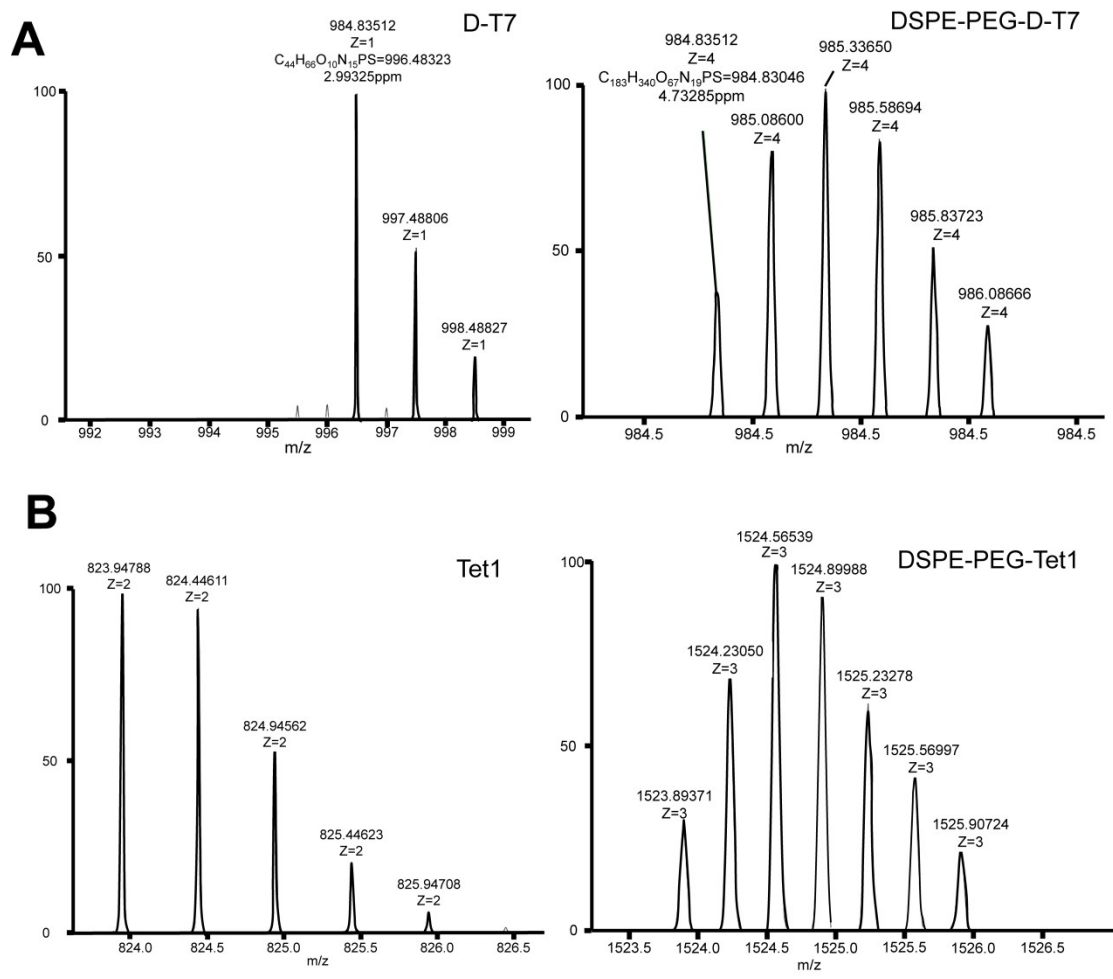

282

283 **Figure S2** Mass spectra of DSPE-PEG-peptides. (A) Mass spectra of D-T7 and  
 284 DSPE-PEG-D-T7. (B) Mass spectra of Tet1 and DSPE-PEG-Tet1.

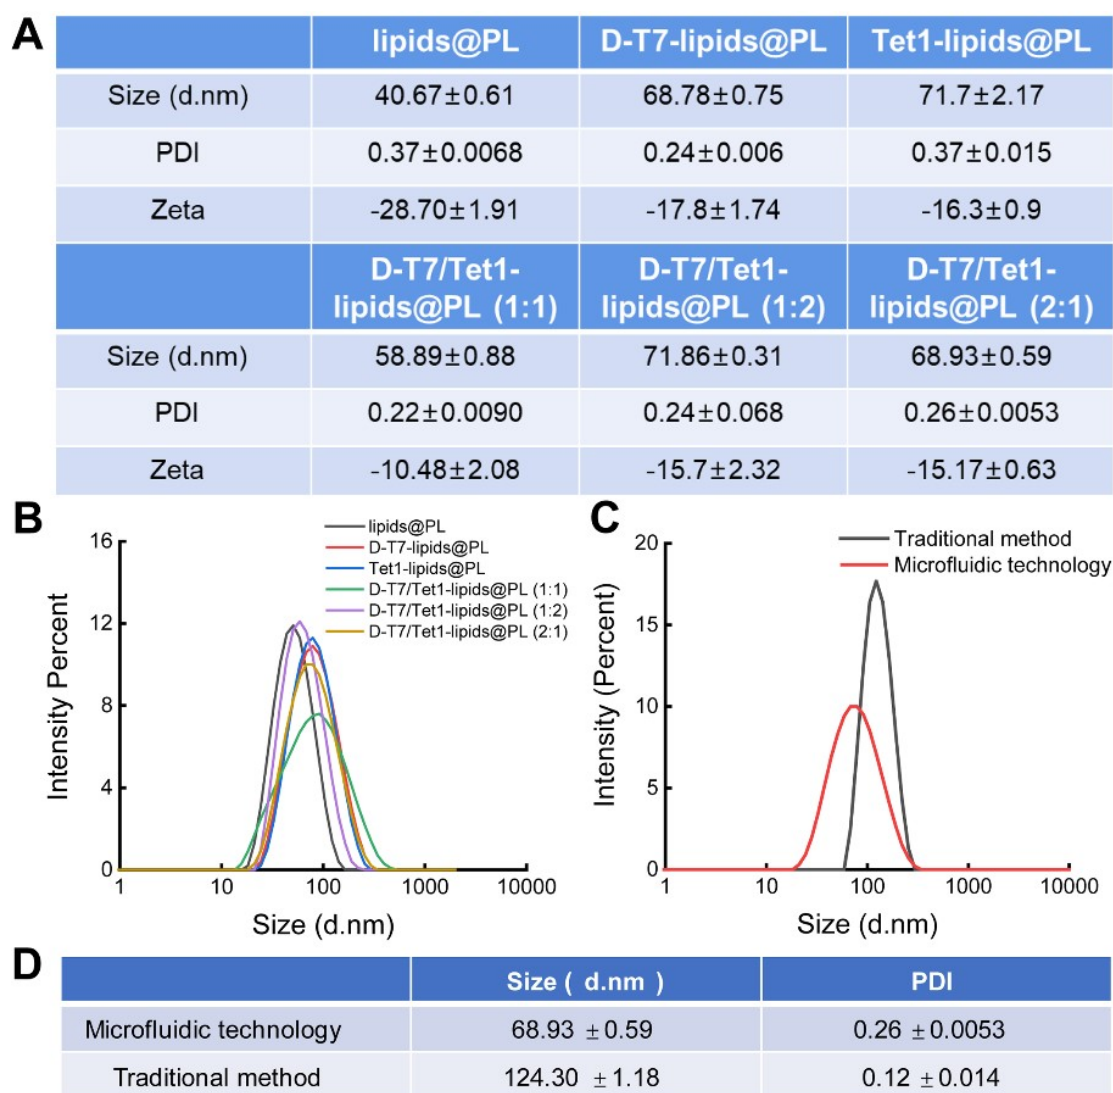

285

286 **Figure S3** Characterization of various nanoparticles. (A-B) DLS characterization of  
 287 D-T7-Lipids@PL, Tet1-Lipids@PL, and D-T7/Tet1-Lipids@PL with different D-  
 288 T7/Tet1 ratios (1:2, 1:1, and 2:1). (C-D) DLS characterization of D-T7/Tet1-  
 289 lipids@PL(2:1) synthesized by microfluidic chip and traditional method.

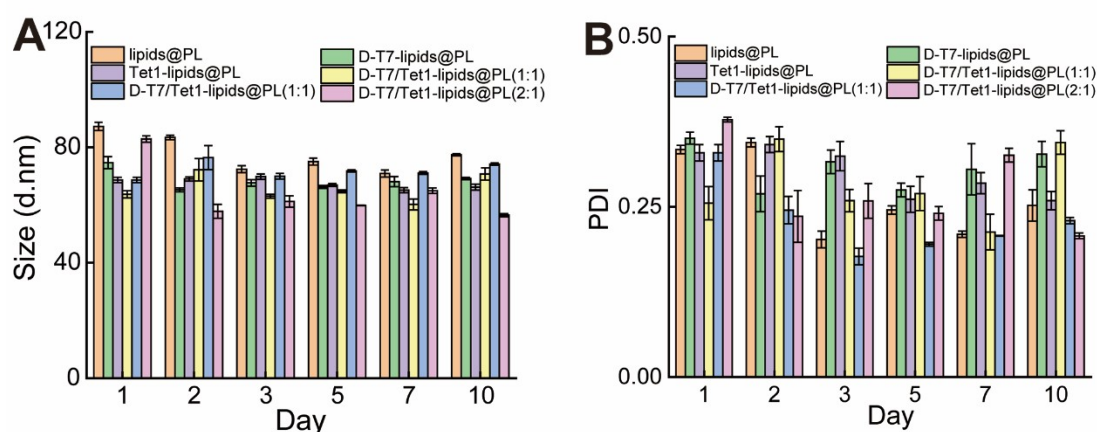

290

291 **Figure S4** Stability test of various nanoparticles in 10 days characterized by DLS.

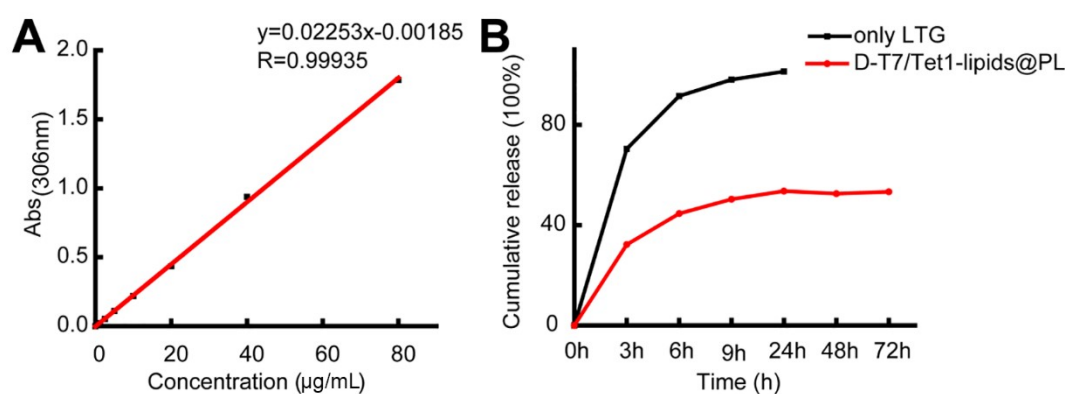

292

293 **Figure S5** Drug release test of D-T7/Tet1-lipids@PL(2:1) NPs. (A) The standard  
294 curve of LTG absorbance at 360 nm. (B) Cumulative drug release of D-T7/Tet1-  
295 lipids@PL(2:1) NPs in PBS (pH 7.4).

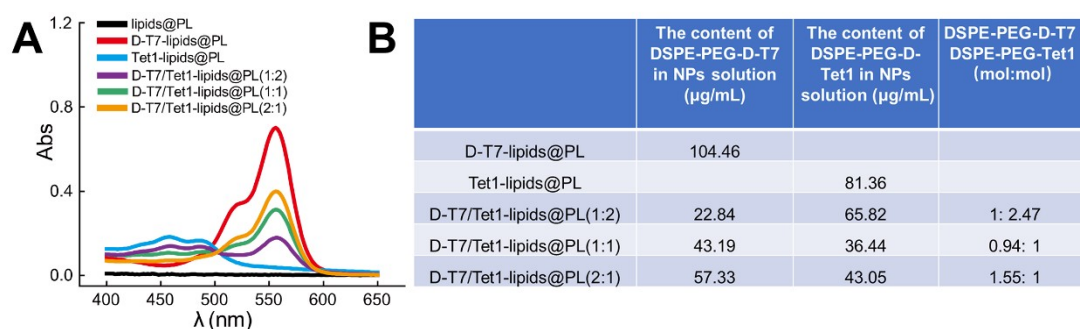

296

297 **Figure S6** UV-vis spectra to characterize the DSPE-PEG-D-T7 and DSPE-PEG-Tet1  
298 in various nanoparticles. A) UV-vis spectra of various NPs. B) The quantified data of  
299 each NP based on the UV-vis spectra.

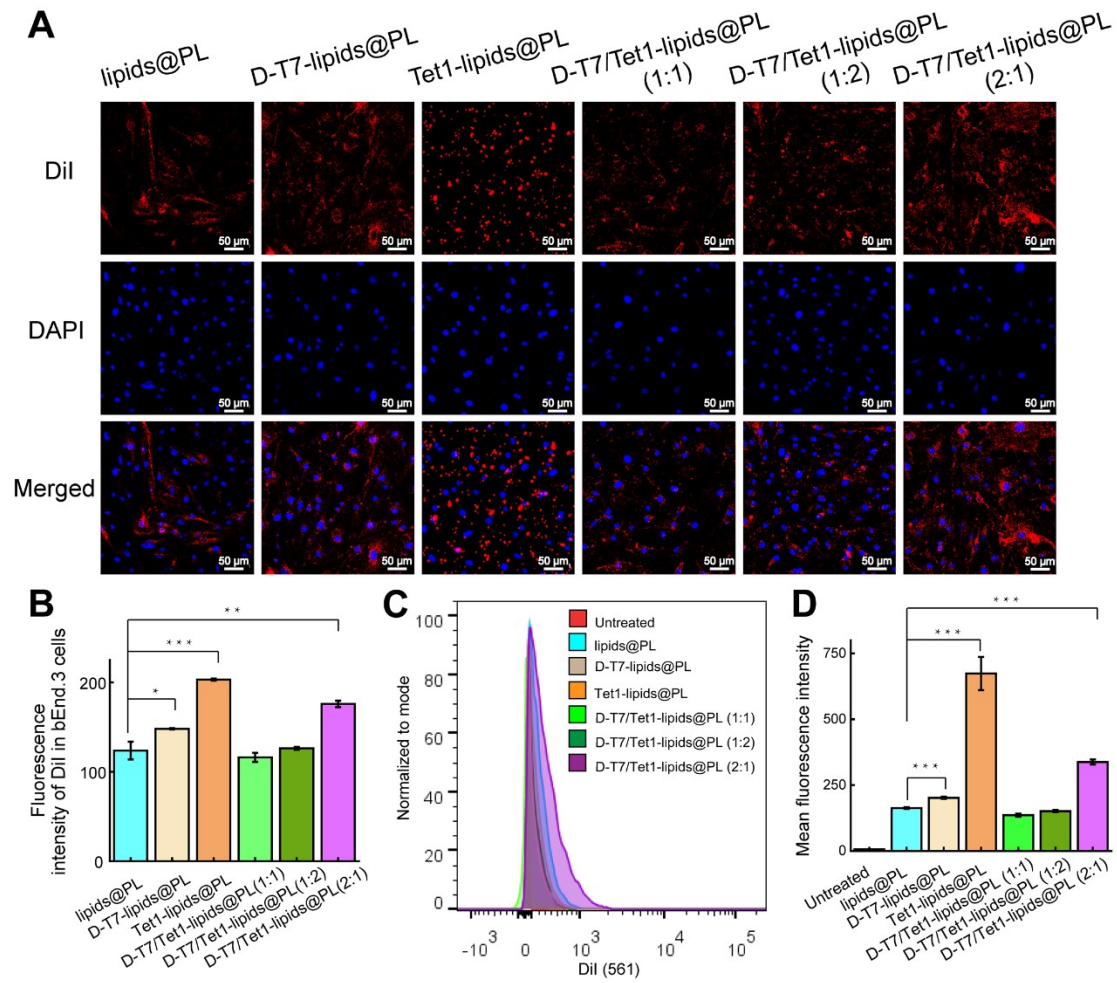

**Figure S7** *In vitro* uptake of various NPs with different D-T7/Tet1 concentration titrations by bEnd.3 cells. (A) Confocal microscopy images of bEnd.3 cells incubated with various nanoparticles at 37 °C for 6 h. The nanoparticles are labeled by DiI. Nuclei are stained by DAPI (blue). Scale bars, 50 μm. (B) Quantitative analysis of the confocal fluorescence images of the nanoparticles internalized in the bEnd.3 cells using Image J. (C) Flow cytometry histogram of bEnd.3 cells incubated with various nanoparticles at 37 °C for 6 h. DiI is used to label the nanoparticles. (D) Data from the flow cytometry which shows the mean fluorescence intensity of the bEnd.3 cells incubated with various nanoparticles at 37 °C for 6 h. The nanoparticles are labelled by DiI. \*  $P < 0.005$ , \*\*\*  $P < 0.001$ .

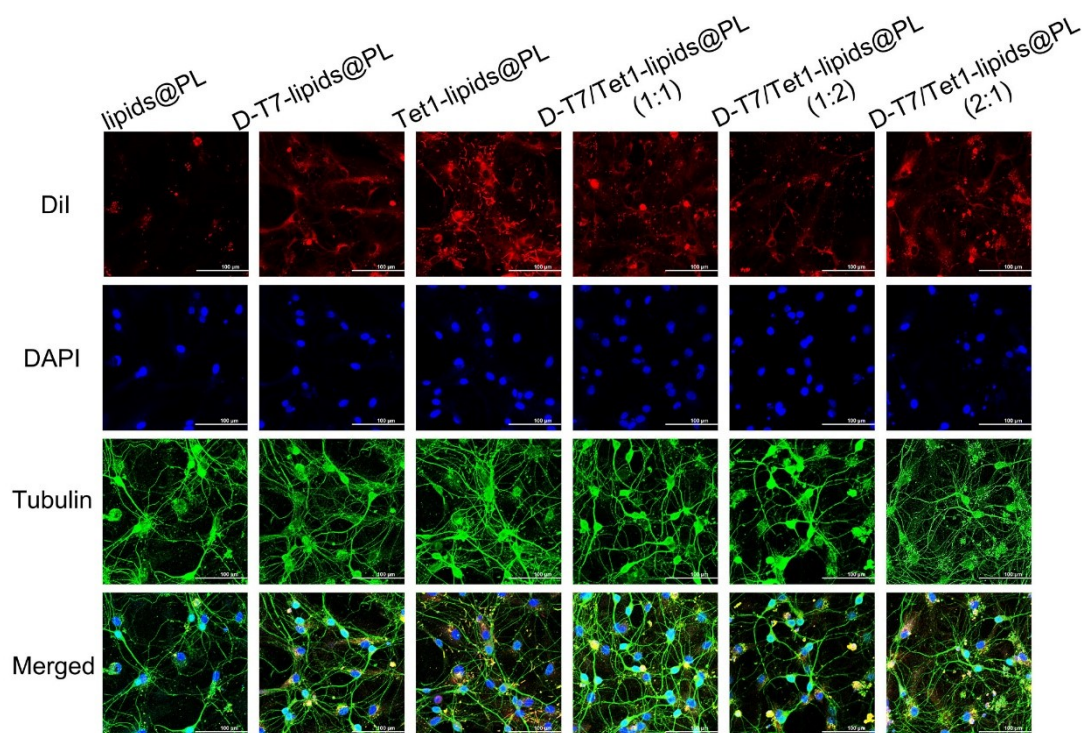

311

312 **Figure S8** Confocal microscopy images of neurons incubated with various  
 313 nanoparticles at 37 °C for 6 h. The nanoparticles were labeled by DiI. The nuclei were  
 314 stained by DAPI (blue). The neurons were stained by tubulin (Green). Scale bars, 100  
 315  $\mu\text{m}$ .

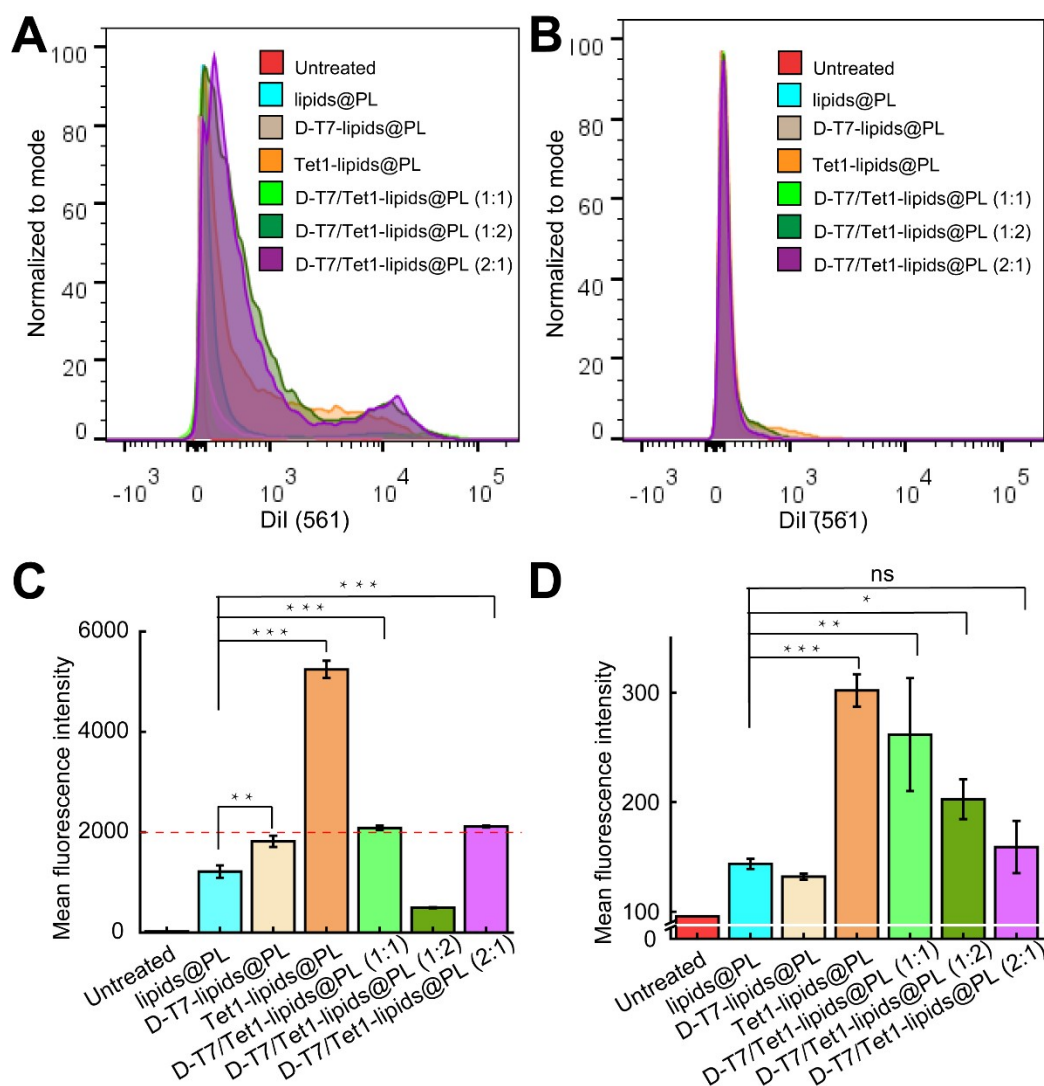

316

317 **Figure S9** *In vitro* internalization of various NPs with different D-T7/Tet1  
 318 concentration titrations in hippocampal neurons and SY5Y cells. Flow cytometry  
 319 histogram of hippocampal neurons A) and SY5Y cells B) incubated with  
 320 nanoparticles at 37 °C for 6 h. DiI is used to label the nanoparticles. Data from flow  
 321 cytometry show the mean fluorescence intensity of the hippocampal neurons C) and  
 322 SY5Y cells D) incubated with nanoparticles at 37 °C for 6 h. \*  $P < 0.05$ , \*\*  $P < 0.01$ ,  
 323 \*\*\*  $P < 0.001$ .

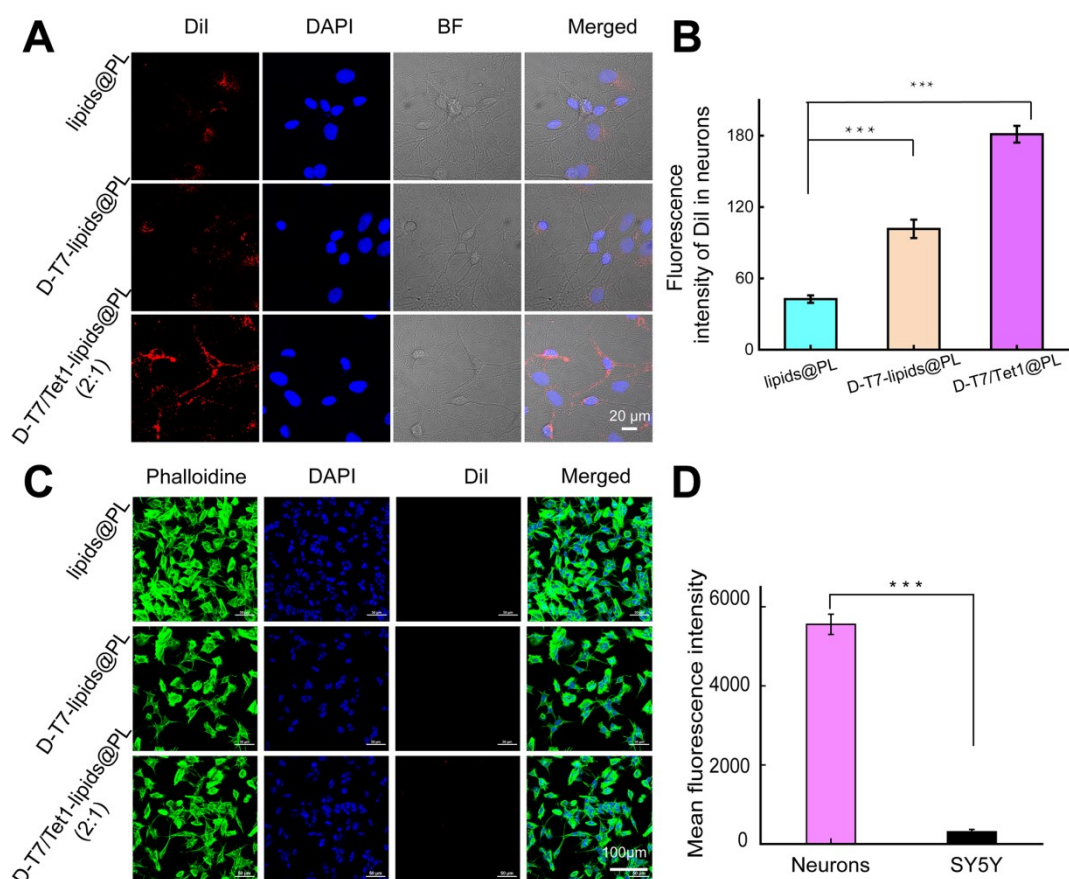

324

325 **Figure S10** *In vitro* internalization of NPs by hippocampal neurons and SY5Y cells.  
 326 (A) Confocal microscopy images of hippocampal neurons incubated with lipids@PL,  
 327 D-T7-lipids@PL, and D-T7/Tet1-lipids@PL (2:1) at 37 °C for 6 h. The nanoparticles  
 328 are labeled by DiI. The cell nuclei are stained by DAPI (blue). Scale bars, 20  $\mu$ m. (B)  
 329 Quantitative analysis of the fluorescence of the nanoparticles internalized in the  
 330 hippocampal neurons using Image J. (C) Confocal microscopy images of the SY5Y  
 331 cells incubated with various nanoparticles at 37 °C for 6 h. The nanoparticles are  
 332 labeled by DiI. The cell nuclei are stained by DAPI (blue). The SY5Y cells are  
 333 stained by phalloidine (green). Scale bars, 100  $\mu$ m. (D) Data from flow cytometry  
 334 which shows the mean fluorescence intensity of the hippocampal neurons and SY5Y  
 335 cells incubated with the nanoparticles at 37 °C for 6 h. The nanoparticles are labelled  
 336 by DiI. \*\*\*  $P < 0.001$ .

337

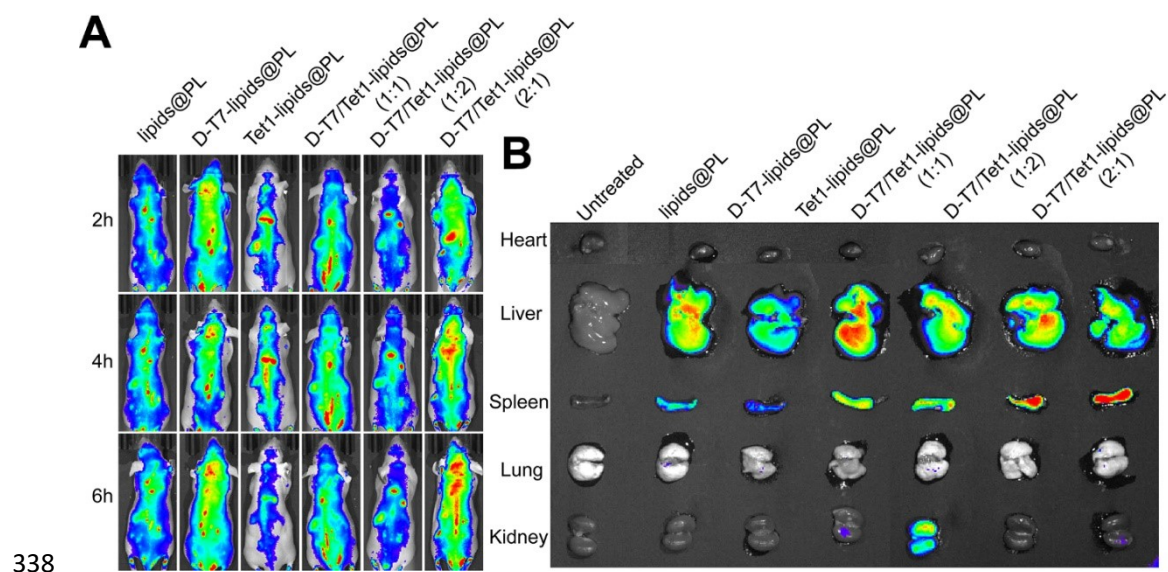

**Figure S11** Fluorescence distribution of different NPs *in vivo*. (A) *In vivo* imaging shows the distribution of different NPs with different D-T7/Tet1 concentration titrations in mice at different time points. (B) Fluorescent imaging of the organs *ex vivo* 24 h after injection of DiR-labelled NPs.

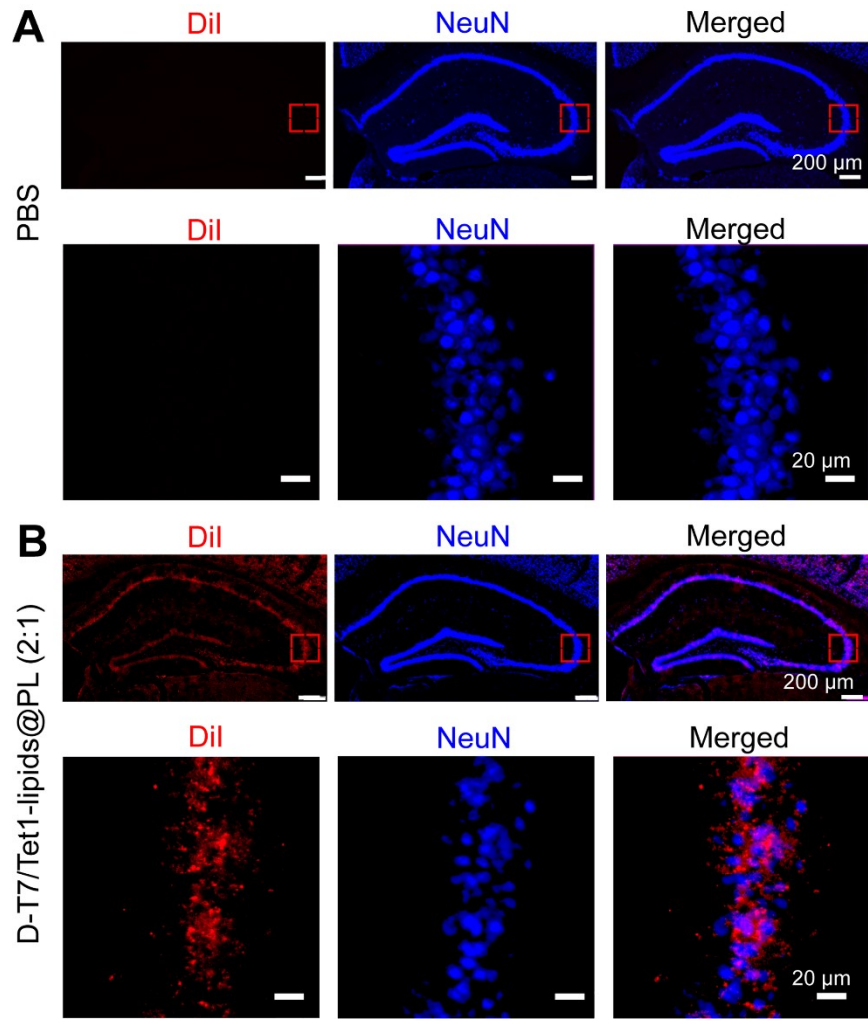

344

345 **Figure S12** Immunofluorescence of mice brain dorsal hippocampus (dHPC) treated  
 346 with D-T7/Tet1-lipids@PL(2:1) NPs labelled by DiI. The neuron nuclei are stained  
 347 by NeuN (blue). Scale bar, 200 μm and 20 μm.

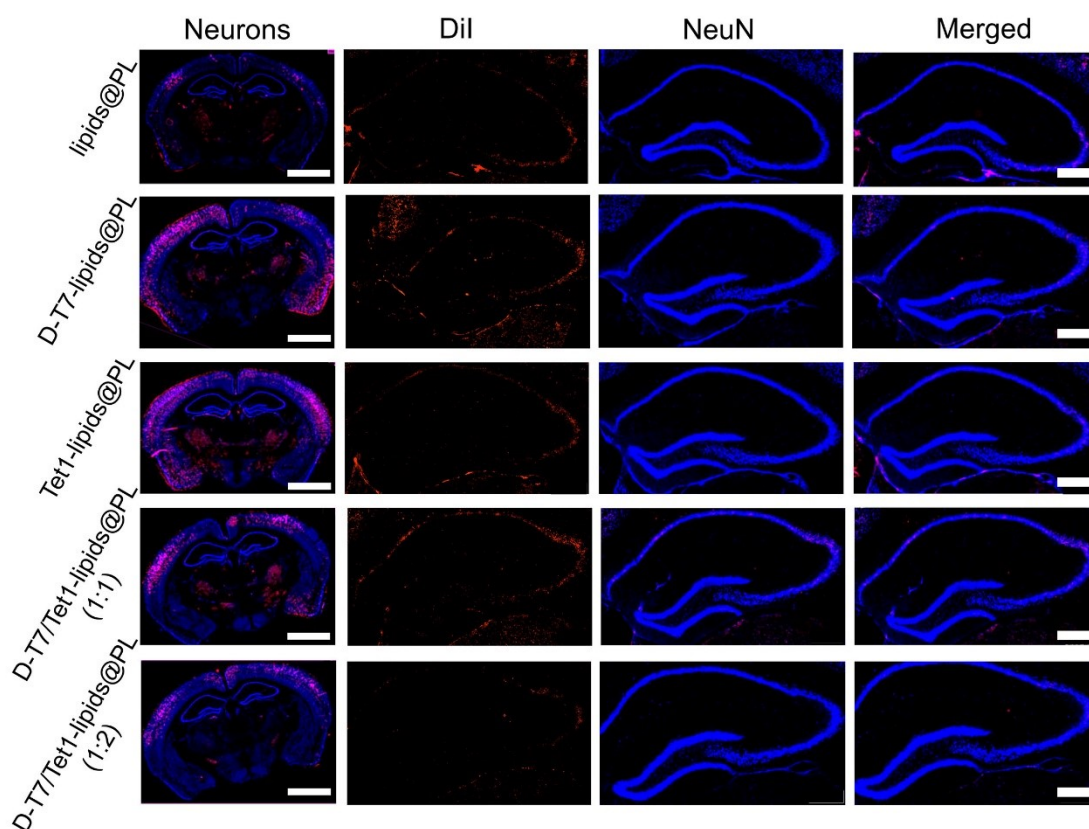

348  
 349 **Figure S13** Immunofluorescence of mice brain dorsal hippocampus (dHPC) treated  
 350 with various NPs labelled by DiI. The neuron nuclei were stained by NeuN (blue).  
 351 Scale bar, 2 mm and 200  $\mu$ m.

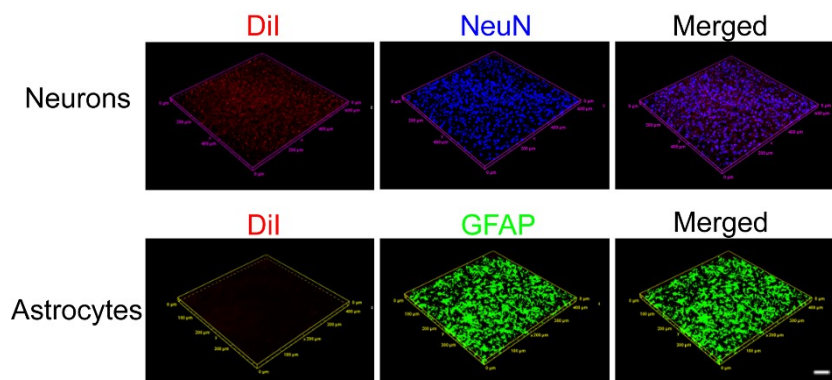

352  
 353 **Figure S14** 3D images of immunofluorescence of mice brain treated with D-T7/Tet1-  
 354 lipids@PL(2:1) labelled by DiI. The neuron nuclei are stained by NeuN (blue), the  
 355 astrocytes are stained by GFAP (green). Scale bar, 100  $\mu$ m.

356

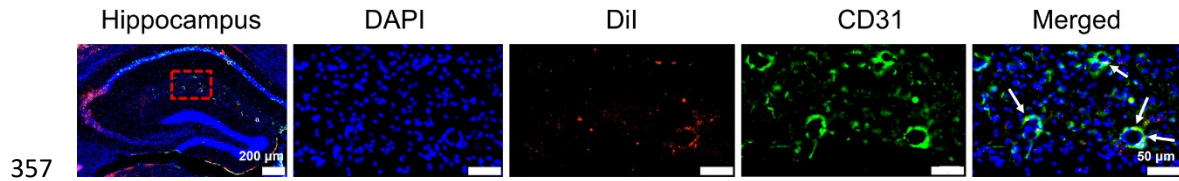

**Figure S15** Immunofluorescence of mice brain treated with D-T7/Tet1-lipids@PL(2:1) NPs labelled by DiI. The cell nuclei were stained by DAPI (blue). The vascular endothelial cells were stained by CD31 antibody. Scale bar, 200 μm and 50 μm.

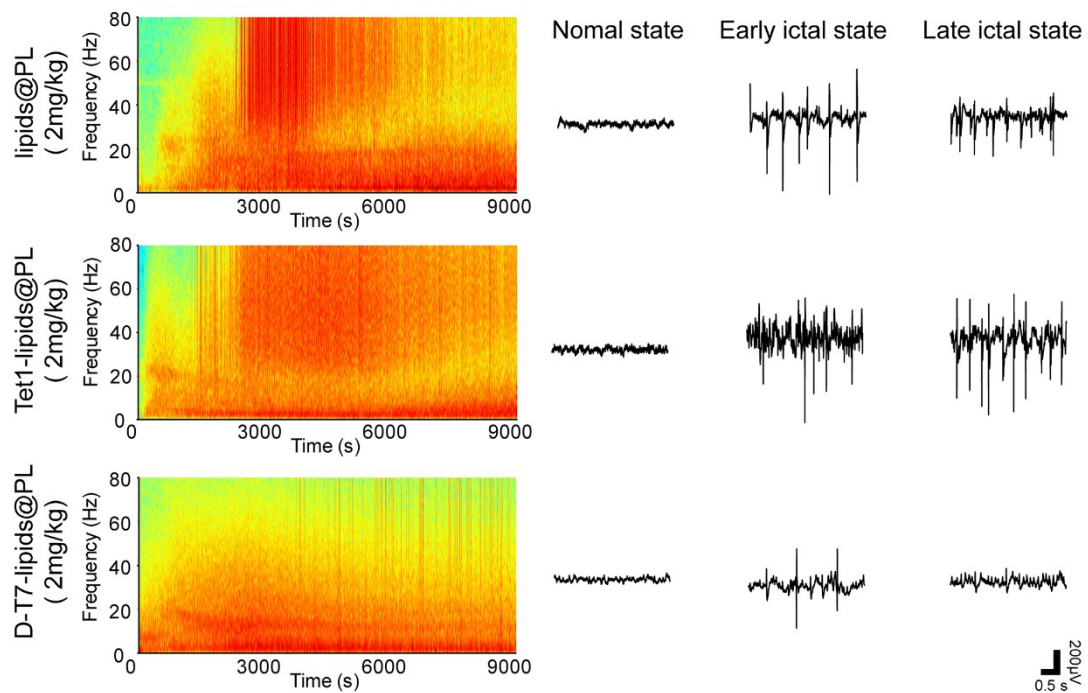

**Figure S16** A 2.5-hour spectrogram of LFPs recorded in the dorsal hippocampus after modeling. Raw LFPs are recorded from the representative channels in the dorsal hippocampus. Representative raw LFPs of normal state, early ictal state and late ictal state are recorded in the dorsal hippocampus of mice after KA injection.

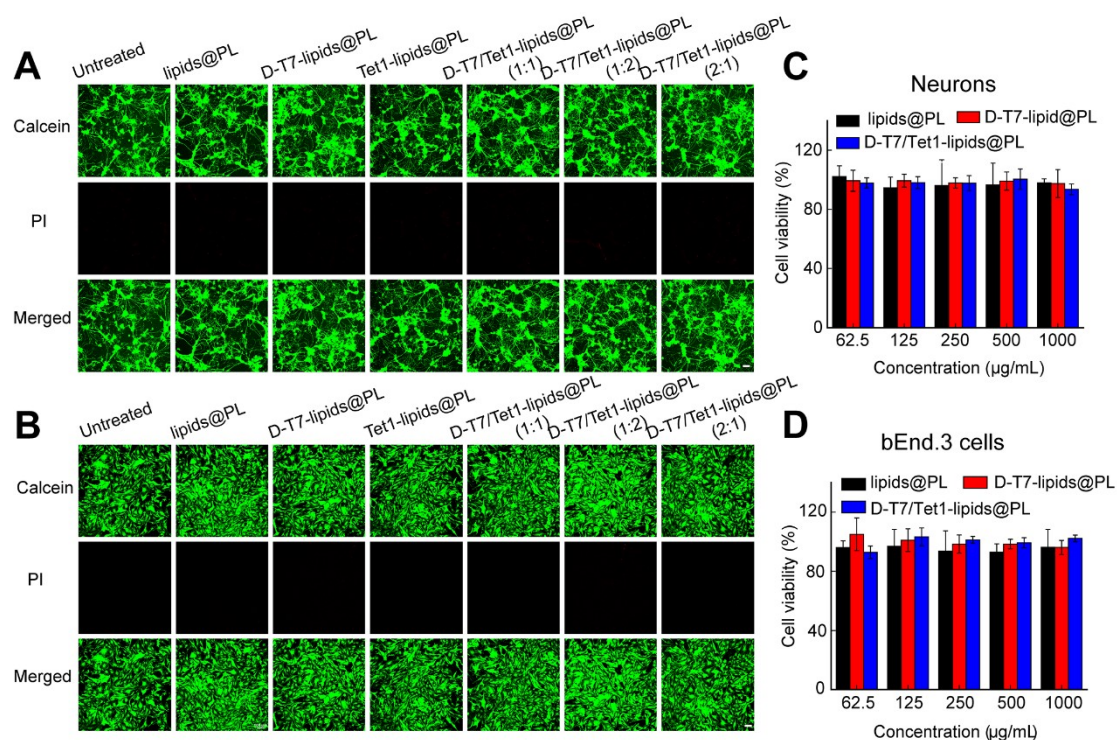

368  
 369 **Figure S17** Cytotoxicity assay of the nanoparticles. Confocal microscopy image of  
 370 hippocampal neurons A) and bEnd.3 cells B) co-cultured with various nanoparticles  
 371 for 12 hours. The cells are stained by Calcein (green)/PI (red). Scale bar, 100 μm. The  
 372 cell viability of hippocampal neurons C) and bEnd.3 cells D) after 24 h of incubation  
 373 with the nanoparticles tested by CCK8 assay.

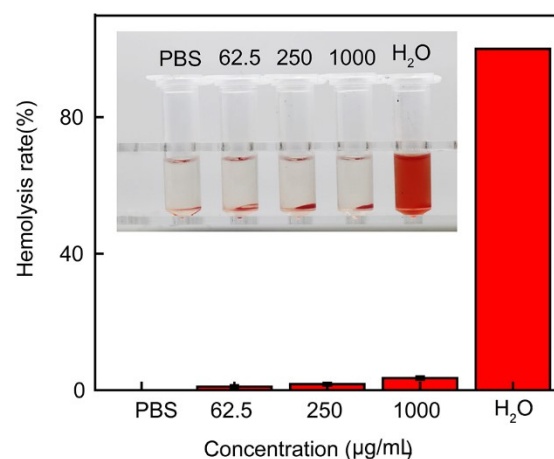

374  
 375 **Figure S18** Hemolysis test of D-T7/Tet1-lipids@PL (2:1) nanoparticles at different  
 376 concentrations. (n = 3).

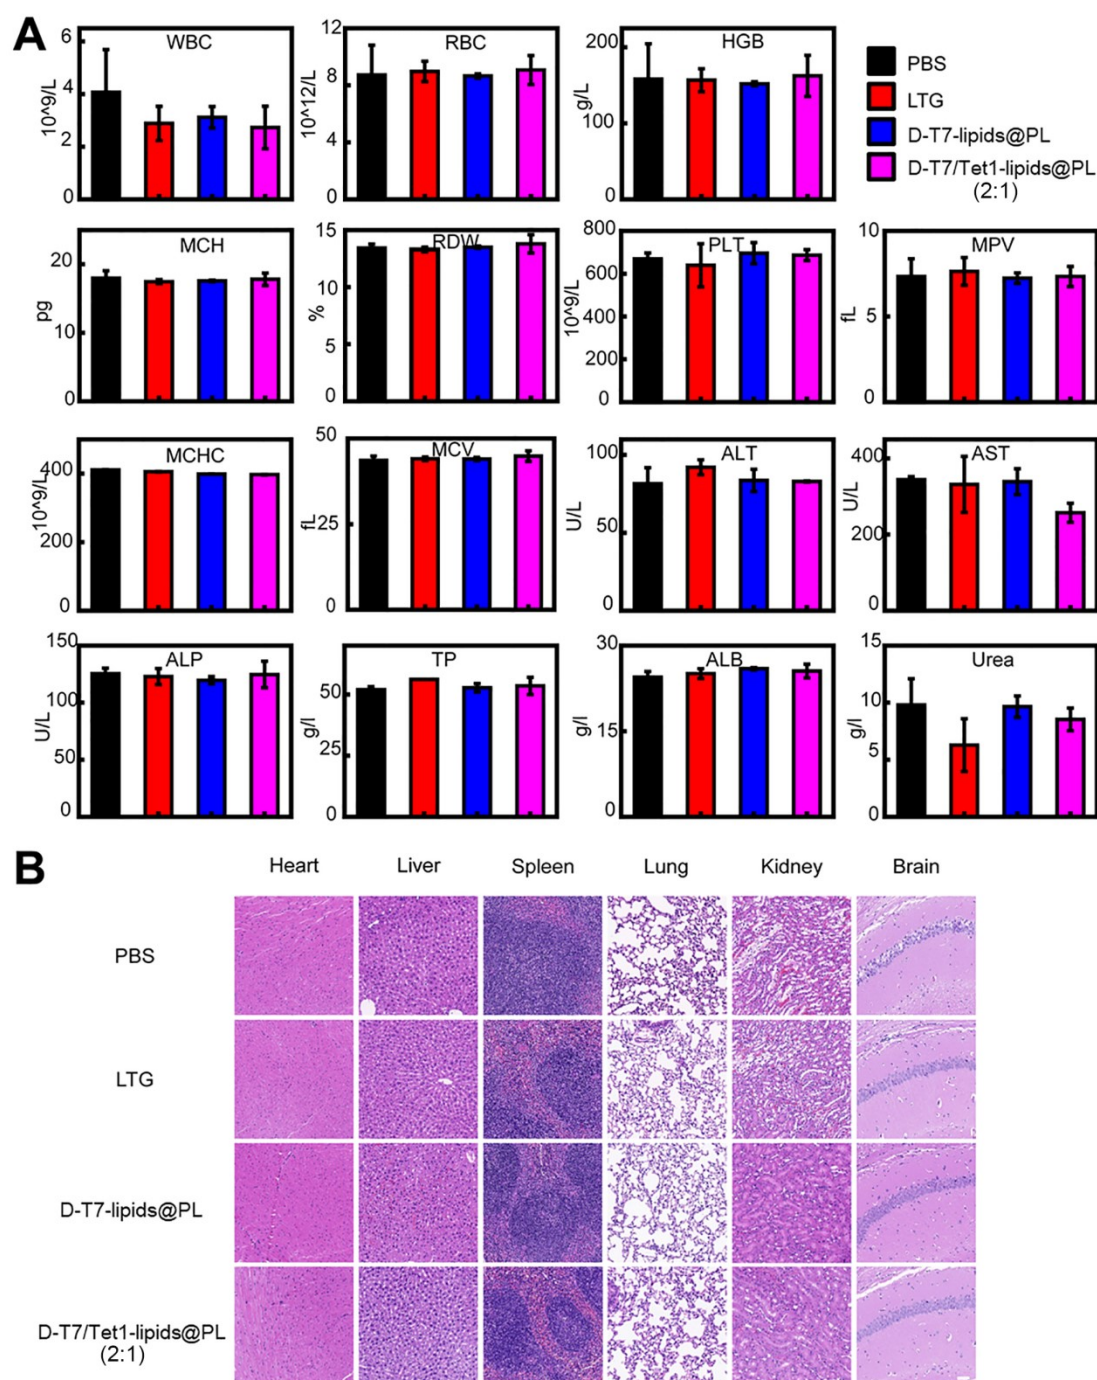

377

378 **Figure S19** Biocompatibility test of various nanoparticles in an acute epilepsy mice  
 379 model. (A) *In vivo* biosafety evaluation of various nanoparticles assessed by  
 380 hematological markers and biochemical parameters in blood. (B) *In vivo* biosafety of  
 381 various nanoparticles assessed by histopathological analysis. Scale bar, 50  $\mu$ m. (n = 3).

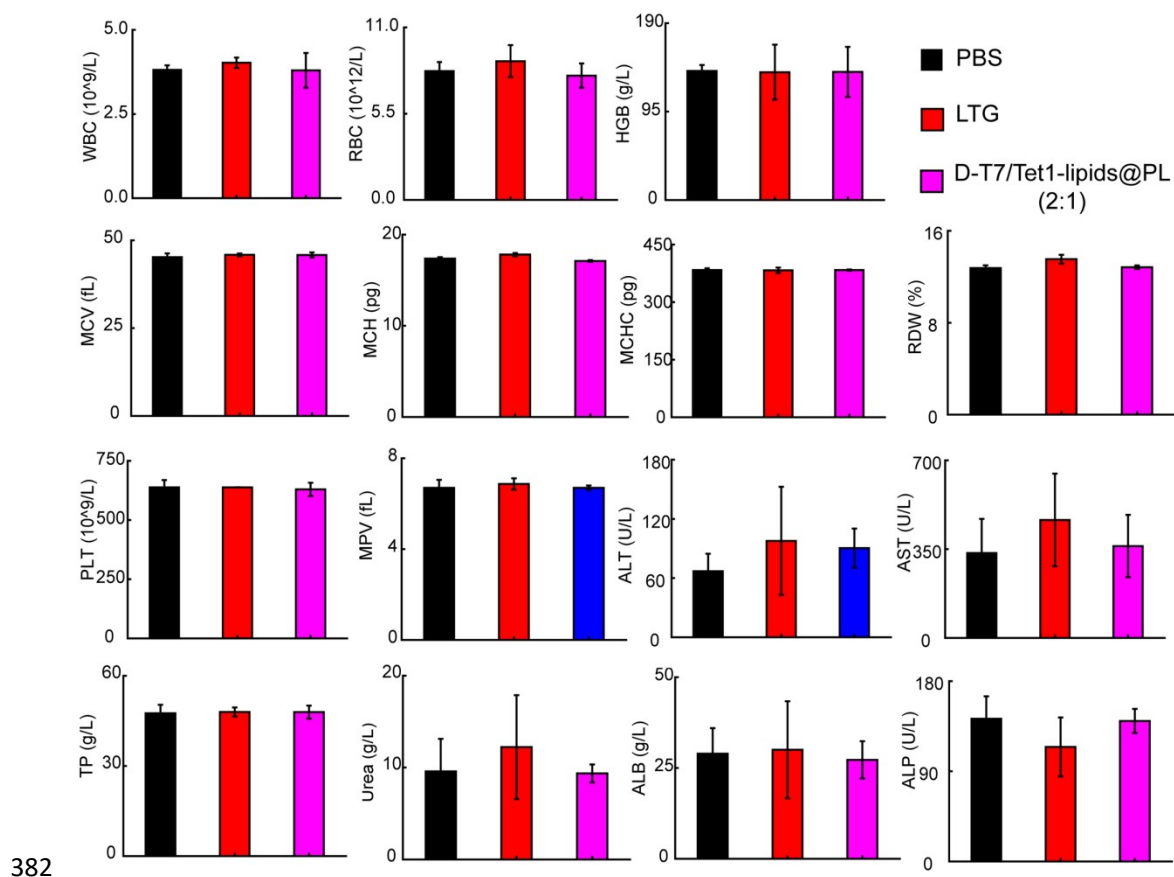

**Figure S20** *In vivo* biosafety evaluation of various nanoparticles assessed by hematological markers and biochemical parameters in blood after 6 weeks of nanoparticles treatment in a chronic epilepsy model. (n = 3)

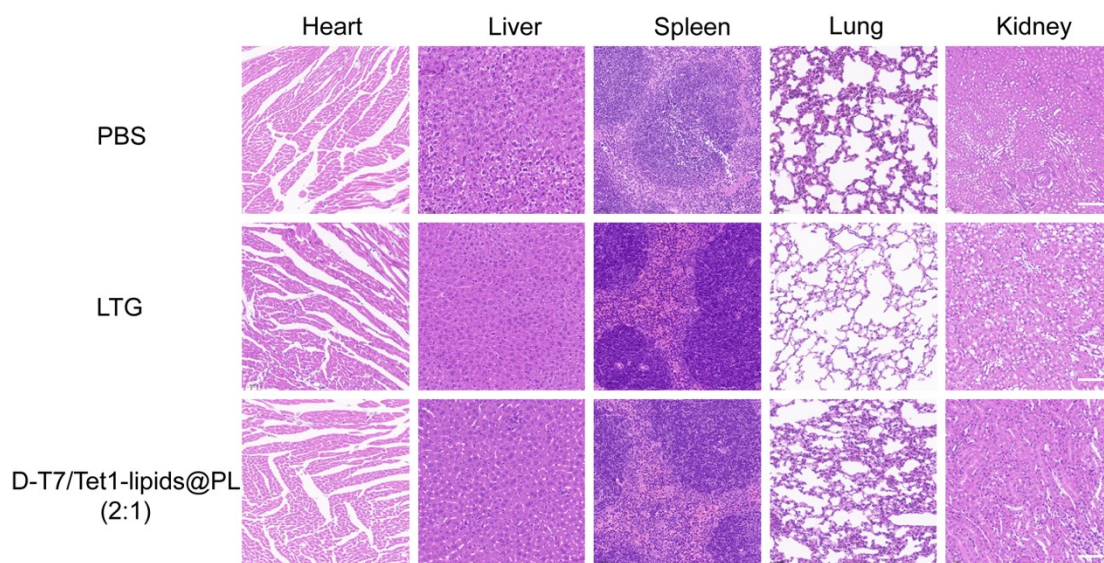

387 **Figure S21** *In vivo* biosafety of various nanoparticles assessed by histopathological  
388 analysis after 6 weeks of nanoparticles treatment in a chronic epilepsy model. Scale  
389 bar, 50  $\mu\text{m}$ .

## 390 References

- 391 1 L. Zhang, Q. Feng, J. L. Wang, S. Zhang, B. Q. Ding, Y. J. Wei, M. D. Dong, J.-  
392 Y. Ryu, T.-Y. Yoon, X. H. Shi, J. S. Sun, X. Y. Jiang, *ACS Nano*, 2015, **9**, 9912-9921.  
393 2 Q. Feng, L. Zhang, C. Liu, X. Y. Li, G. Q. Hu, J. S. Sun, X. Y. Jiang,  
394 *Biomicrofluidics*, 2015, **9**, 052604.  
395 3 L. Zhang, J. M. Chan, F. X. Gu, J. W. Rhee, A. Z. Wang, A. F. Radovic-Moreno,  
396 F. Alexis, R. Langer, O. C. Farokhzad, *ACS Nano*, 2008, **2**, 1696-1702.  
397 4 Y. Sun, Z. Huang, W. W. Liu, K. X. Yang, X. Y. Jiang, *Biointerphases*, 2012, **7**,  
398 29.  
399
